# Supplementary material for: Leaf Curl Epidemic Risk in Chilli as a Consequence of Vector Migration Rate and Contact Rate Dynamics: A Critical Guide to Management
Source: MDPI journal article supplement (doi:10.3390/v15040854), 2023-03-27
Supplement: s1 [file s1]

Table S1. Model parameters and variables used for leaf curl epidemic analysis in chili.

| Symbol | Name                                                      | Estimated range/adjusted                                  |
|--------|-----------------------------------------------------------|-----------------------------------------------------------|
| $a$    | Transmission rate                                         | 0.057 - 0.10 plant vector <sup>-1</sup> day <sup>-1</sup> |
| $K_x$  | Michaelis-Menten for rate of change in healthy vector (X) | 2.8 healthy vector week <sup>-1</sup>                     |
| $b$    | Acquisition rate                                          | 0.1115 vector plant <sup>-1</sup> h <sup>-1</sup>         |
| $i_v$  | Immigration rate for viruliferous vector                  | 0.34 vector week <sup>-1</sup>                            |
| $e_v$  | Emigration rate for viruliferous vector                   | 0.005 vector week <sup>-1</sup>                           |
| $i_x$  | Immigration rate for healthy vector                       | 0.05 vector week <sup>-1</sup>                            |
| $e_x$  |                                                           | 0.005 vector week <sup>-1</sup>                           |
| $u$    | Death rate for healthy as well as viruliferous vector     | 0.34 vector week <sup>-1</sup>                            |
| $c$    | Birth rate for healthy as well as viruliferous vector     | 0.05 vector week <sup>-1</sup>                            |
| $S$    | Healthy plant (1- $I$ )                                   | 0-1.0                                                     |
| $I$    | Infectious plant (PCR- positive)                          | 0-0.99                                                    |
| $V$    | Viruliferous vector (PCR- positive)                       | 0.65-0.97                                                 |
| $S^*$  | Healthy plant (1- $I^*$ ) at equilibrium                  | 0-1.0                                                     |
| $X^*$  | Healthy vector (1- $V$ )                                  | 0-1.0                                                     |
| $V^*$  | Viruliferous vector population at equilibrium             | 0-1.0                                                     |
| $I^*$  | Infectious population at equilibrium                      | 0-1.0                                                     |

Table S2. Sampling procedure for estimation of proportion of infection in leaf and whitefly population through PCR detection of ChiLCV.

| Step                                                                                                                                                                                                                                                                                                                                                                                                                                                                                                                                                                                                                                                                                                                                                                                                                                                                                                          | Composite sampling and PCR detection for ChiLCV                                                                                                                                                                                                              |                                                                                                                                                                                                                                    |
|---------------------------------------------------------------------------------------------------------------------------------------------------------------------------------------------------------------------------------------------------------------------------------------------------------------------------------------------------------------------------------------------------------------------------------------------------------------------------------------------------------------------------------------------------------------------------------------------------------------------------------------------------------------------------------------------------------------------------------------------------------------------------------------------------------------------------------------------------------------------------------------------------------------|--------------------------------------------------------------------------------------------------------------------------------------------------------------------------------------------------------------------------------------------------------------|------------------------------------------------------------------------------------------------------------------------------------------------------------------------------------------------------------------------------------|
|                                                                                                                                                                                                                                                                                                                                                                                                                                                                                                                                                                                                                                                                                                                                                                                                                                                                                                               | Leaf                                                                                                                                                                                                                                                         | Whitefly (Wf)                                                                                                                                                                                                                      |
| 1                                                                                                                                                                                                                                                                                                                                                                                                                                                                                                                                                                                                                                                                                                                                                                                                                                                                                                             | 200 leaves collected from the individual plant                                                                                                                                                                                                               | 100 Wf collected from the individual plant                                                                                                                                                                                         |
| 2                                                                                                                                                                                                                                                                                                                                                                                                                                                                                                                                                                                                                                                                                                                                                                                                                                                                                                             | Divided into two groups of 125 and 75 leaves. <ul style="list-style-type: none"> <li>First, 125 leaves again divided into 5 groups consists of 25 leaves.</li> <li>Remaining 75 leaves divided into 3 groups consists of 25 leaves in each group.</li> </ul> | Divided into two group of 70 and 30 Wf. <ul style="list-style-type: none"> <li>First, 70 Wf divided into 7 groups consists of 10 Wf.</li> <li>Remaining 30 Wf divided into 3 groups consists of 10 flies in each group.</li> </ul> |
|                                                                                                                                                                                                                                                                                                                                                                                                                                                                                                                                                                                                                                                                                                                                                                                                                                                                                                               | PCR detection using degenerate primers pairs                                                                                                                                                                                                                 |                                                                                                                                                                                                                                    |
|                                                                                                                                                                                                                                                                                                                                                                                                                                                                                                                                                                                                                                                                                                                                                                                                                                                                                                               | If not all PCR-positive (in first 5 groups) then follow PCR detection for the remaining 3 group                                                                                                                                                              |                                                                                                                                                                                                                                    |
|                                                                                                                                                                                                                                                                                                                                                                                                                                                                                                                                                                                                                                                                                                                                                                                                                                                                                                               | Calculate $P^* = 1 - ((n-X)/n)^{1/m}$ ; $n$ = number of groups; $m$ = number of leaves or whiteflies in each group; $X$ = number of groups tested PCR- positive.                                                                                             |                                                                                                                                                                                                                                    |
|                                                                                                                                                                                                                                                                                                                                                                                                                                                                                                                                                                                                                                                                                                                                                                                                                                                                                                               | $n=(5+3)=8$<br>$m=25$                                                                                                                                                                                                                                        | $n=7+3=10$<br>$m=10$                                                                                                                                                                                                               |
| 3                                                                                                                                                                                                                                                                                                                                                                                                                                                                                                                                                                                                                                                                                                                                                                                                                                                                                                             | If all 5 groups PCR-positive in step 2 then remaining 75 leaves divided in to two groups of 50 and 25 leaves and PCR detection.                                                                                                                              | If all 5 groups PCR-positive in step 3 then remaining 30 WF divided in to two groups of 20 and 10 WF and PCR detection.                                                                                                            |
|                                                                                                                                                                                                                                                                                                                                                                                                                                                                                                                                                                                                                                                                                                                                                                                                                                                                                                               | Group of 50 divided into 10 groups each group having 5 samples                                                                                                                                                                                               | Group of 20 divided into 5 groups each group having 4 samples                                                                                                                                                                      |
|                                                                                                                                                                                                                                                                                                                                                                                                                                                                                                                                                                                                                                                                                                                                                                                                                                                                                                               | PCR detection using degenerate primers pairs                                                                                                                                                                                                                 |                                                                                                                                                                                                                                    |
|                                                                                                                                                                                                                                                                                                                                                                                                                                                                                                                                                                                                                                                                                                                                                                                                                                                                                                               | If not all PCR-positive (in 10 groups) then calculate $P^*$ with $n=10$ and $m=5$                                                                                                                                                                            | If not all PCR-positive (in 5 groups) then calculate $P^*$ with $n=5$ and $m=4$                                                                                                                                                    |
| 4                                                                                                                                                                                                                                                                                                                                                                                                                                                                                                                                                                                                                                                                                                                                                                                                                                                                                                             | If all 10 groups PCR-positive in step 3 then for the remaining 25 leaves PCR detection for each leaf.                                                                                                                                                        | If all 5 groups PCR-positive in step 3 then for remaining 10 WF, PCR detection with single fly.                                                                                                                                    |
|                                                                                                                                                                                                                                                                                                                                                                                                                                                                                                                                                                                                                                                                                                                                                                                                                                                                                                               | Calculate $P^*$ as simple proportion out of 25 leaves                                                                                                                                                                                                        | Calculate $P^*$ as simple proportion out of 10 flies                                                                                                                                                                               |
| <b>PCR METHOD:</b><br>For ChiLCV detection, genomic DNA was isolated from the leaf and whitefly samples (CTAB method). PCR was performed in 25 µl reaction mixture containing 20-30 ng genomic DNA, 2.5µl of 10X PCR buffer (Thermo Scientific), 1 µl of each forward (GEM-F) and reverse (GEM-R) primers (Eurofins), 260 µM of dNTP (Thermo Scientific) and 2U of DreamTaq polymerase (Thermo Scientific). Degenerate pair primers (GEM-F: 5'-ATRRHTTGATGGAYGARAACAT-3'; GEM-R: 5'-AAATCCCCCTNTATTTCAAARAT-3') was used to amplify approximately 760 bp sequence partially overlapping the putative AV1, AC3 and AC2 genes (Roy <i>et al.</i> , 2015) following amplification steps: 94°C for 2 m, 35 cycles of 94°C for 30 s, 48°C for 45 s and 72°C for 30s; 72°C for 10 m (Thermocycler, Hi-Media). PCR-positive of a sample was confirmed by the presence of specific (760 bp) band in agarose gel (2%). |                                                                                                                                                                                                                                                              |                                                                                                                                                                                                                                    |
